# Supplementary material for: A short insertion mutation disrupts genesis of miR-16 and causes increased body weight in domesticated chicken
Source: PubMed Central journal article supplement (PMC5093740; doi:10.1038/srep36433), 2016-11-03
Supplement: srep36433-s1.pdf [file srep36433-s1.pdf]

# **A short insertion mutation disrupts genesis of miR-16 and causes increased body weight in domesticated chicken**

Xinzheng Jia<sup>1,2,3</sup>, Huiran Lin<sup>1,2</sup>, Qinghua Nie<sup>1,2\*</sup>, Xiquan Zhang<sup>1,2</sup>, Susan J.  
Lamont<sup>3</sup>

<sup>1</sup>Department of Animal Genetics, Breeding and Reproduction, College of Animal Science, South China Agricultural University, Guangzhou 510642, Guangdong, China.

<sup>2</sup>Guangdong Provincial Key Lab of Agro-Animal Genomics and Molecular Breeding, and Key Laboratory of Chicken Genetics, Breeding and Reproduction, Ministry of Agriculture, Guangzhou 510642, Guangdong, China.

<sup>3</sup>Department of Animal Science, Iowa State University, Ames, IA 50011, USA

\*To whom correspondence should be addressed. Tel. 86-20-85285759. Fax. 86-20-85280740. Email: [nqinghua@scau.edu.cn](mailto:nqinghua@scau.edu.cn).

## Supplementary data

**Supplementary Table S1. Annotation of differentially expressed genes and GWAS data.**

| Nearby genes    | Gene Location           | SNP ID         | SNP position (galGal4) | Traits with SNP effects* (GWAS)                            |
|-----------------|-------------------------|----------------|------------------------|------------------------------------------------------------|
| <b>SUCLA2</b>   | 167942414-<br>167962711 | GGaluGA054587  | 167936820              |                                                            |
|                 |                         | Gga_rs15496102 | 167956206              |                                                            |
|                 |                         | Gga_rs14916980 | 168692233              | SC6, SC8                                                   |
| <b>miR-16-1</b> | 168694548-<br>168694631 | Gga_rs15498187 | 168713010              |                                                            |
|                 |                         | Gga_rs13972116 | 168745370              | BW10, BW12, GR0-4, GR0-8, SL10, SL12, SC 10, SC12, SW, AFW |
| <b>CKAP2</b>    | 169701518-<br>169710954 | GGaluGA055247  | 169702400              |                                                            |
|                 |                         | Gga_rs13973293 | 169712027              | FCR 6-8                                                    |

\*SNP effects were identified in two independent GWAS of F2 intercross lines of fast-growing and slow-growing birds, conducted by Xie et al. (2012), and Sheng et al. (2013). SC, shank circumference; BW, body weight; GR, growth rate; SL, shank length; SW, stomach weight; AFW, abdominal fat weight; FCR, feed conversion ratio.

**Supplementary Table S2. Mutations of miR-15a-16 in XH and WRR chickens. \*chicken SNP data bank ([www.ncbi.nlm.nih.gov/snp](http://www.ncbi.nlm.nih.gov/snp)).**

| Marker | Chr | Chr Position | Type          | SNP to refSNP |
|--------|-----|--------------|---------------|---------------|
| Indel  | 1   | 168694917    | 54-bp Del/Ins |               |
| SNP1*  | 1   | 168694793    | C/T           | rs315624237   |
| SNP2   | 1   | 168694612    | C/T           |               |

**Supplementary Table S3.** Genotype of F0 generation of XH & WRR family population. Gel detection was performed for mutation genotyping in 28 F0 individuals. DD, homozygous deletion type; ID, heterozygous type; II, homozygous insertion type.

|              | Low-weight line |    |    | High-weight line |    |    |
|--------------|-----------------|----|----|------------------|----|----|
| Genotype     | II              | ID | DD | II               | ID | DD |
| Number       | 0               | 3  | 11 | 6                | 7  | 1  |
| Frequency(I) | 10.71%          |    |    | 63.33%           |    |    |

**Supplementary Table S4.** Different splicing patterns between insertion and deletion types. 3'RACE PCR technology was performed for detecting alternative splicing. For each genotype, total 100 clones were randomly chosen for sequencing.

|           | Splicing 1 | Splicing 2 | Splicing 3 | Splicing 4 | Splicing 5 | Splicing 6 |
|-----------|------------|------------|------------|------------|------------|------------|
| Insertion | 14% (13)   | 11% (10)   | 13% (12)   | 34% (32)   | 28% (26)   | 0% (0)     |
| Deletion  | 0% (0)     | 0% (0)     | 14% (13)   | 0% (0)     | 37% (34)   | 47% (41)   |

**Supplementary Table S5.** Primers used for PCR amplification and vector construction in this study.

| Gene         | Forward primer (5' to 3')     | Reverse primer (5' to 3')     | Purpose                                               |
|--------------|-------------------------------|-------------------------------|-------------------------------------------------------|
| gga-miR-16   | tagcagcacgtaaattggtg          | miScript Universal primer     | Validation of differentially expressed miRNAs by qPCR |
| gga-miR-15a  | tagcagcacataatggttgt          | miScript Universal primer     |                                                       |
| U6           | cgatacagagaagattagcatgg       | miScript Universal primer     |                                                       |
| RACE-5-F     | aagcagtggtaacaacgcagagt (NUM) | ttaaagtgatggtgtgtatata        | RACE PCR                                              |
| RACE-3-F     | ctgctacaggctacttgctaa         | aagcagtggtaacaacgcagagt (NUM) |                                                       |
| Pri-miR-16-1 | tgcagttcacatcaatacac          | ttaccgaagcactgttagac          | Scanning mutation                                     |
| Pri-miR-16-2 | ggaccataacagattctgt           | ggctacaaacctgctgtgctt         |                                                       |

|                |                                    |                                     |                                        |
|----------------|------------------------------------|-------------------------------------|----------------------------------------|
| miR-16-1(GT)   | tcctcagtaaatacccacat<br>a          | gaactgcattaactacaaa<br>atc          | Genotyping for insertion mutation      |
| miR-(-12-145)  | taaataaacaagcagcttg<br>gc          | tttgaggacgtagaaaccta<br>t           | qPCR for insertion region              |
| miR-(-293-119) | tgctacaggctacttgctaac              | atattgccaagctgcttggt                |                                        |
| miR-(-293-173) | tgctacaggctacttgctaac              | tttagactttattgaaatct                |                                        |
| pcDNA-pri-miR  | gacgggtaccagggtgatttc<br>atcctacgc | atttgcggccgtagttaaca<br>atcttagggtc | Constructing the pcDNA-II and pcDNA-DD |

## Reference

1. Sheng, Z. *et al.* Genetic dissection of growth traits in a Chinese indigenous x commercial broiler chicken cross. *BMC Genomics* **14**, 151 (2013).
2. Xie, L. *et al.* Genome-wide association study identified a narrow chromosome 1 region associated with chicken growth traits. *PLoS One* **7**, e30910 (2012).
